# Supplementary material
Source: publisher figshare collection journal article supplement (https://tandf.figshare.com/articles/dataset/_/5915347)
Supplement: Supplementary file 1 [file 1]

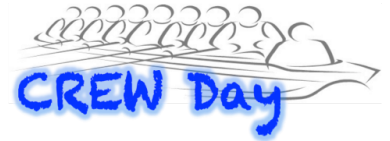

## CREW Day Agenda

*Monday, May 26, 2014*

|                                                                                                                                              |            |
|----------------------------------------------------------------------------------------------------------------------------------------------|------------|
| <b>Arrival of participants</b> <ul style="list-style-type: none"><li>• Registration</li><li>• Tea, coffee and snacks provided</li></ul>      | 8:15-8:45  |
| <b>Workshop begins in the “Large” Room</b> <ul style="list-style-type: none"><li>• Welcome</li><li>• Presentation of the CREW team</li></ul> | 8:45-9:15  |
| <b>Group brainstorming and discussion</b>                                                                                                    | 9:15-10:30 |

***Nutrition and Networking Break (provided)*** 10:30-11:00

|                                                                        |             |
|------------------------------------------------------------------------|-------------|
| <b>Discussion: topics to cover in OT/PT ethics teaching (3 groups)</b> | 11:00-12:00 |
|------------------------------------------------------------------------|-------------|

***Lunch (provided)*** 12:00-1:00

|                                   |           |
|-----------------------------------|-----------|
| <b>Breakout group discussions</b> | 1:00-2:45 |
|-----------------------------------|-----------|

***Nutrition and Networking Break (provided)*** 2:45- 3:00

|                                                                                                                                                                                                  |           |
|--------------------------------------------------------------------------------------------------------------------------------------------------------------------------------------------------|-----------|
| <b>Discussion: ideas from the breakout group discussions</b>                                                                                                                                     | 3:00-3:30 |
| <b>Wrap up</b> <ul style="list-style-type: none"><li>• Presentation of the Wiki</li><li>• Reminder of the telephone interview in 9 months</li><li>• End of the CREW day &amp; Goodbyes</li></ul> | 3:30-4:00 |
