# Supplementary material
Source: publisher figshare collection journal article supplement (https://tandf.figshare.com/articles/dataset/_/5915347)
Supplement: Supplementary file 2 [file 1]

## **Structured interview grid about the CREW knowledge exchange project**

Telephone interview of about 15 minutes, themes and issues to be address with participants

### **1. CREW Day contributions**

- First, can you describe briefly your experience of participating in CREW Day?

### **2. Changes in current teaching methods**

- Can you tell me if things have changed since your participation in CREW DAY, for example in your teaching?
  - If necessary, clarify with: In your professional skills, in your teaching, your interest in ethics or knowledge?
- Have you made changes to your current course plan following (and related to) the CREW Day?
  - If so, what kind of changes? (teaching hours, subjects taught, learning objectives)
- Have you used new teaching methods in your classes following the CREW day?
- Have you incorporated new learning tools in your courses?
- Have you suggested new resources or tools to your students following the CREW day?
- Any other changes on an educational level?

### **3. Use of the 'Wiki' site**

- Have you consulted the 'wiki' website on ethics education since it went online?
  - If yes
    - i. Approximately how many times have you used it?
    - ii. Have you made contributions to the 'wiki'? (i.e. write text or share information)
  - **If no, why not?**
- Did you like receiving the PDF format wiki and was this PDF helpful?
  - Make participant specify: was it useful a little, moderately, a lot... ?
- Do you have any comments on the appropriateness of this tool, or how to make it better?

### **4. Contacts created (networking / collaborations) after CREW Day**

- Have you had contact or collaboration with the team or participants after the CREW Day?
  - If yes, what kind of collaborations? (academic, funds, research, publications, other) and please give details about these...
  - If no, what would have been required in order to create such collaborations?

### **5. Changes to approaches to ethics in rehabilitation**

- Following the CREW Day last May, how has your perception of ethics teaching in rehabilitation changed?

### **6. Answers to expectations**

- Did we meet your expectations on this knowledge exchange project?
  - If yes, how?
  - If no, why not?

### **7. Changes at the institutional level**

- Have there been changes at your institution regarding the offered ethics courses, or have you asked for changes to be made to the organization of ethics courses at your institution?

#### 8. General comments

- Do you have any general comments to us on your participation in the CREW Day, the Day itself, or on ways to improve for future projects?
  - [This question might already have been answered by the other questions in the questionnaire, so only ask if pertinent and if not answered yet...]

#### 9. Future collaborations

- Would you be interested in participating in future projects on the teaching of ethics in rehabilitation?
  - What type of project would be of interest for you?
