# Supplementary material
Source: publisher figshare collection journal article supplement (https://tandf.figshare.com/articles/dataset/_/5915347)
Supplement: Supplementary file 3 [file 1]

## Evaluation Tool for appreciation and utility of the CREW Day

Immediately following the CREW Day

### DEMOGRAPHICS

**Age group:**      21-25 ☐      26-30 ☐      31-35 ☐      36-40 ☐      41-50 ☐      more than 50 ☐

**Gender:**      Male ☐      Female ☐

| CREW DAY IMPACT                                                                                     | Completely agree         | Somewhat agree           | Somewhat disagree        | Completely disagree      |
|-----------------------------------------------------------------------------------------------------|--------------------------|--------------------------|--------------------------|--------------------------|
| The workshop day was well adapted to my everyday teaching needs and concerns.                       | <input type="checkbox"/> | <input type="checkbox"/> | <input type="checkbox"/> | <input type="checkbox"/> |
| The workshop day has increased my knowledge of issues related to ethics teaching in rehabilitation. | <input type="checkbox"/> | <input type="checkbox"/> | <input type="checkbox"/> | <input type="checkbox"/> |
| The workshop day increased my knowledge of tools available to teach ethics in rehabilitation.       | <input type="checkbox"/> | <input type="checkbox"/> | <input type="checkbox"/> | <input type="checkbox"/> |
| Potential solutions identified in the workshop day are relevant in my local context.                | <input type="checkbox"/> | <input type="checkbox"/> | <input type="checkbox"/> | <input type="checkbox"/> |
| The workshop day presentation by the facilitators was clear.                                        | <input type="checkbox"/> | <input type="checkbox"/> | <input type="checkbox"/> | <input type="checkbox"/> |
| There was adequate time for discussion and interaction with other participants.                     | <input type="checkbox"/> | <input type="checkbox"/> | <input type="checkbox"/> | <input type="checkbox"/> |
| The format of small discussion group during the afternoon was adequate.                             | <input type="checkbox"/> | <input type="checkbox"/> | <input type="checkbox"/> | <input type="checkbox"/> |
| I will suggest changes to my program to improve the teaching of ethics.                             | <input type="checkbox"/> | <input type="checkbox"/> | <input type="checkbox"/> | <input type="checkbox"/> |
| This workshop helped me identify new or innovative approaches for my ethics teaching.               | <input type="checkbox"/> | <input type="checkbox"/> | <input type="checkbox"/> | <input type="checkbox"/> |

| <b>CREW DAY IMPACT</b>                                                                       | Very likely              | Possibly                 | Unlikely                 | Very unlikely due to the nature of the CREW Day | Very unlikely due to the constraints in my working environment |
|----------------------------------------------------------------------------------------------|--------------------------|--------------------------|--------------------------|-------------------------------------------------|----------------------------------------------------------------|
| How likely are you to change some aspect of your practice as a result of this workshop?      | <input type="checkbox"/> | <input type="checkbox"/> | <input type="checkbox"/> | <input type="checkbox"/>                        | <input type="checkbox"/>                                       |
| How likely is it that you use the "wiki" platform to discuss your teaching ethics practices? | <input type="checkbox"/> | <input type="checkbox"/> | <input type="checkbox"/> | <input type="checkbox"/>                        | <input type="checkbox"/>                                       |

If you answered that you would likely or very likely make some changes or adjust your teaching practices after this workshop day, how are you planning to make these changes?

---



---



---



---

What are the most important things that this day brought to you?

---



---



---



---

Are there any additional comments you would like to share with us?

---

---

---

---

---

A) Do you consent in the use of the data shared with us in this form to be used for scientific purpose (publication, presentation). All efforts will be made to ensure your confidentiality and anonymity. We will not share any personally identifying information about you with anyone without your permission.

I consent ☐      I do not consent ☐

B) Would you like to be contacted to continue some activities that would resemble to a national group on ethics teaching in rehabilitation?

Yes, I would like to be contacted ☐      No, thanks ☐

Thank you for your time!

---
